# Supplementary material for: In situ, time resolved, and simultaneous multi-edge determination of local order change during reduction of supported bimetallic (Pt–Ge) catalyst precursors using energy dispersive EXAFS
Source: Royal Society of Chemistry journal article supplement (doi:10.1039/b008809i), 2001-01-01
Supplement: b008809i.doc [file b008809i.doc]

**Supplementary data.**

The energy window obtainable from the elliptical bending of a monochromator is a function of the geometry of the synchrotron line used, the energy range of interest, and the degree of bend applied to the monochromator crystal.

The bend of a monochromator expressed in terms of an effective radius can be described thus:

**R = (2/Sin*(uv/(u+v)) {1}**

Where R is the effective radius that describes the crystal bend, and ****is the Bragg angle (defined by the **d** spacing of the monochromator material and the X-ray energy). The parameters **u** and **v** are functions of the line geometry. For station 9.3 at CLRC Daresbury are: monochromator to source distance, (**u**) = 21.23 m, and crystal to sample focus (**v**), which is typically 0.7-1.5m. It should be noted that the physical properties of the monochromator material put an intrinsic limit of the degree of bend obtainable before the crystal breaks; in Si[111] case this limit occurs below and **R** of 6m. which corresponds to and effective low energy cut off of ca. 6keV.

The calculation of **R** allows estimation of the energy range (**E**) obtainable at a given incident x-ray energy (**E**) thus:

**E = E*l/(R*tan) {2}**

where **l** = the length of monochromator crystal illuminated by the x-ray beam

Supplementary figure 1 shows a plot of E versus E for station 9.3 at the SRS from 5-18keV which is the useable range of X-ray energies from the current Si[111] monochromator (solid line, **l** =0.2m) and also for a Ge[220] monochromators illuminated over 0.1 ans 0.2m; this is shown as the flux derived from a Si[111] monochromator above 18 keV falls rapidly away and Ge[220] becomes the favoured monochromator crystal.


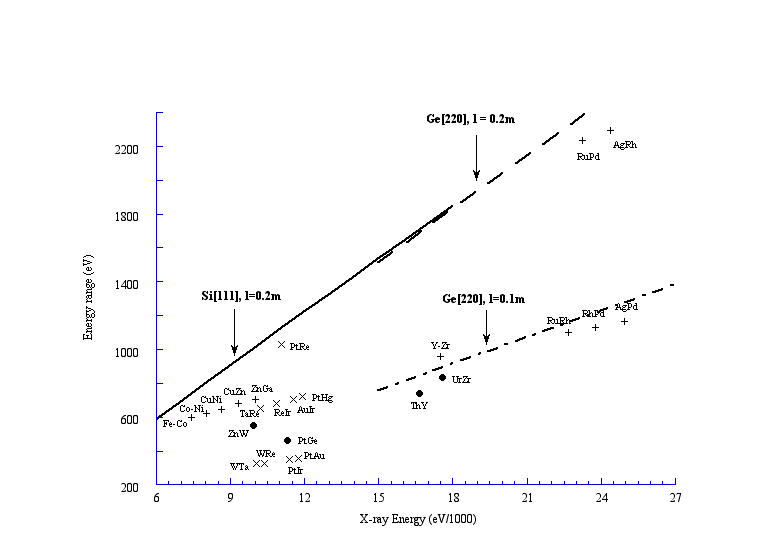
**Supplementary Fig. 1** X-ray energy ranges obtainable on line 9.3 at CLRC, Daresbury using Si[111] (solid line) and ( a hypothetical) Ge[220] (dashed line) monochromators , as a function of X-ray energy (see text). The graph also indicates pairs of elements that have the correct energetic combination of edges (K and LIII) to make this approach possible; in these cases the Y axis shows the energetic difference between the edges of interest, the X axis the energetic midpoint between the edges concerned: filled circles= K-K edge combinations; open circles = K- LIII; and crosses = LIII- LIII combinations.

Superimposed on this graph are some of the pairs of elements that may be amenable to dual study using EDE. the solid circles represent combinations of K edge excitation; the open circles combination of K and LIII edges; the crosses from combinations of LIII edges. Only instances where at least 300 eV of data can be acquired for the lowest energy edge (before the second edge of interest is excited) are shown. Also, in those cases where L edges are involved, the energetic proximity of the LII edges has been checked to ensure that they will not leads to undue truncation of the data available from the highest energy edge to be studied. In this graph the Y axis serves to show both the energy range obtainable from the monochromators given the parameters described above, and indicate the energetic separation of the edges involved in each of the systems indicated.

This analysis, does not take into account the transmission characteristics of the cell and sample used. In the current case we use a system based upon thin walled quartz tubes. Using this configuration, and tubes of ca 2mm diameter (~0.1mm wall thickness) we have successfully investigated supported Ga systems at the Ga K edge (E = 10367 eV)1 for Ga loadings of <10 wt%, through to 2.5 wt% Rh/Al2O3 samples2 (K edge =23220 eV, Quartz tube I.D ~ 3mm, wall thickness ~0.1-0.2 mm)

We consider it possible that this methodology may be applicable to investigation of supported Cu-Zn systems (Cu K =8979 eV). However, the range of compositions that may be sucessfully interrogated may be limited due to the intrinsic adsorption properties of the sample (determined by Cu and Zn loading and the packing of the sample tube). It may therefore be the case that thinner quartz tubes, such as those used by Clausen et al*3* in their QuEXAFS studies of Cu based systems, may be required3 in these energy and compositional ranges.

It should further be noted that the resolution of the detector used must also be considered due to the finite number of pixels that exist within desired energy window. The current detector used on station 9.3 at Daresbury has 1000 useable pixels and therefore we might estimate that a useable window of 3KeV may be expected; this gives ~3eV/pixel, which given the intrinsic width of EXAFS features, should not interfere with analysis).

Lastly, the intrinsic nature of EDE means that, within any obtainable energy window, the quality of the EXAFS obtained will be determined by the spatial uniformity of the sample and reference over the width of the focussed beam. Typically the beam is focussed using vertical slits (ca. 200m) such that the entire beam passes through at its focus. Using powder samples, which might be thought to represent the greatest challenge in terms of spatial uniformity, we have shown that over an energy window of ca. 1100 eV our samples are uniform enough to yield analysable data across ~870eV. We can therefore anticipate that, in systems where methods of sample preparation such as sample pressing are not problematic, that considerably extended energy ranges will be achievable due to the intrinsically higher spatial uniformity afforded the sample through pressing.

**Supplementary references.**

1. S Turin, S G Fiddy, M A Newton, T Campbell, A J Dent, J Evans, I Harvey, and G Salvini, to be published.

2. See for instance, B S Clausen, L Grabaek, G Steffensen, P L Hansen, and H Tøpsoe *Catal. Lett*. 1993, *20*, 23

3. M A Newton,, D G Burnaby, A J Dent, S Diaz-Moreno, J Evans, S G. Fiddy, T Neisius, S Pascarelli, and S Turin., Angew. Chem. Intl. Ed. submitted, and “ESRF Highlights 1999” ESRF, Grenoble, 2000
